# Supplementary material for: Overall Structural Alteration of Gut Microbiota and Relationships with Risk Factors in Patients with Metabolic Syndrome Treated with Inulin Alone and with Other Agents: An Open-Label Pilot Study
Source: PubMed Central journal article supplement (PMC9136633; doi:10.1155/2022/2078520), 2022-05-19

## Supplementary Figure 2

A

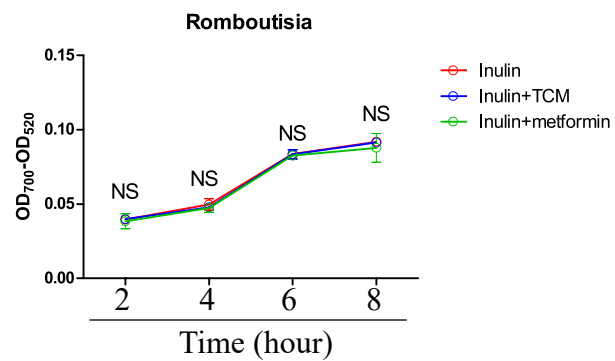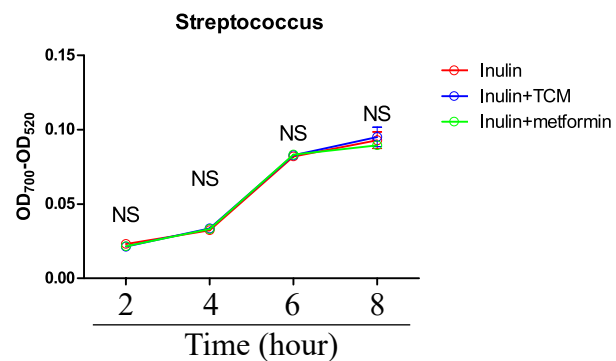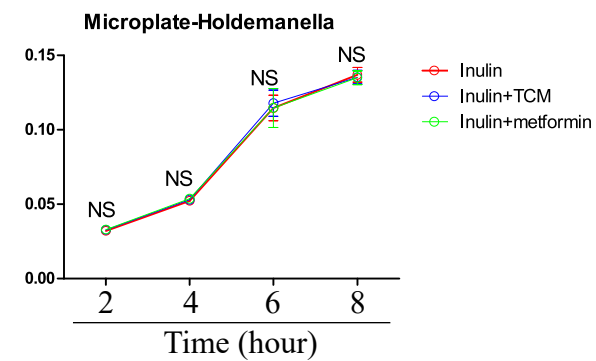

B

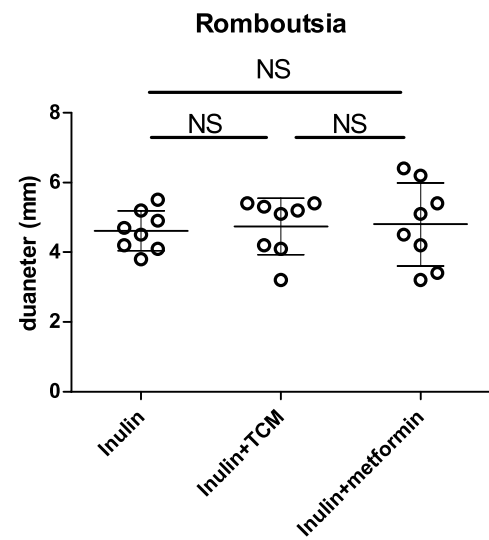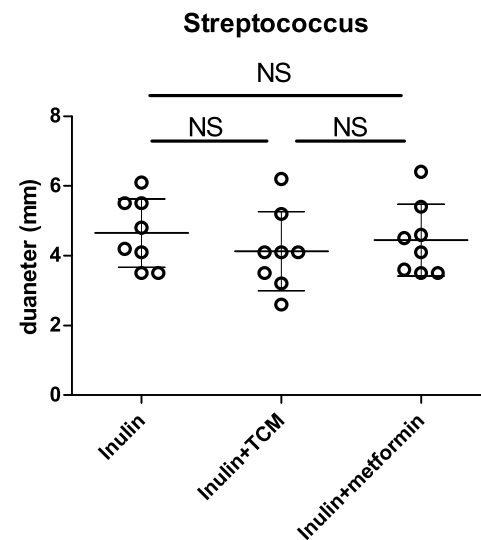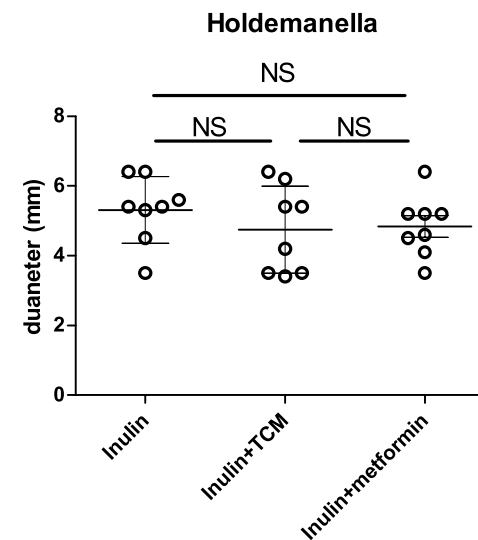

Supplement: 2078520.f4.pdf [file 2078520.f4.pdf]
