# Supplementary material for: Overall Structural Alteration of Gut Microbiota and Relationships with Risk Factors in Patients with Metabolic Syndrome Treated with Inulin Alone and with Other Agents: An Open-Label Pilot Study
Source: Hindawi journal article supplement (doi:10.1155/2022/2078520), 2022-05-19
Supplement: f1 [file 2078520.f1.pdf]

**Supplementary Table 1. The composition of herbal formula**

| Herbs                               | Boil-free granules weight (g/day) <sup>a</sup> |
|-------------------------------------|------------------------------------------------|
| <i>Atractylodes Macrocephala</i>    | 15                                             |
| <i>Tangerine Peel</i>               | 15                                             |
| <i>Coptis Chinensis</i>             | 15                                             |
| <i>Coke Malt</i>                    | 15                                             |
| <i>Medicated Leaven(stir-fried)</i> | 15                                             |
| <i>Nawthorn Fruit(charred)</i>      | 15                                             |

<sup>a</sup> Each herb was processed into boil-free granules and packed into individual bags.
