# Supplementary material for: Overall Structural Alteration of Gut Microbiota and Relationships with Risk Factors in Patients with Metabolic Syndrome Treated with Inulin Alone and with Other Agents: An Open-Label Pilot Study
Source: Hindawi journal article supplement (doi:10.1155/2022/2078520), 2022-05-19

Supplementary Figure 1

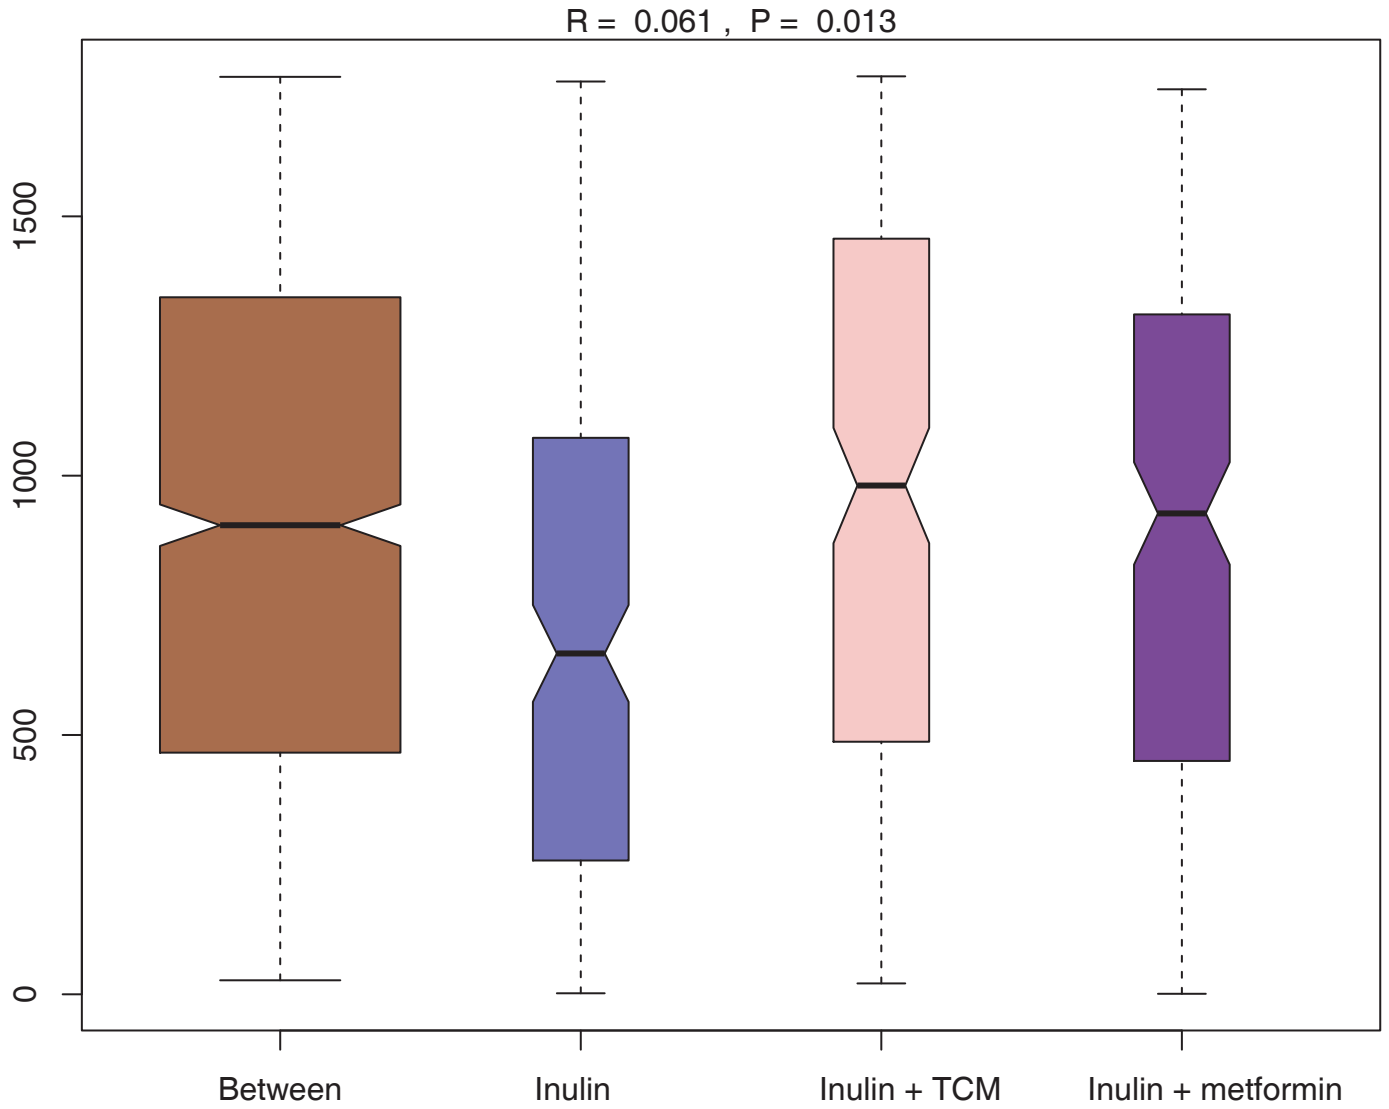

Supplement: f3 [file 2078520.f3.pdf]
